# Supplementary material for: An experimental and modeling study on the catalytic effects of select metals on the fast pyrolysis of hardwood and softwood lignin
Source: Royal Society of Chemistry journal article supplement (doi:10.1039/d1gc04837f), 2022-01-01
Supplement: d1gc04837f1.pdf [file d1gc04837f1.pdf]

Table S1. DFT calculated values of bond length and binding energy on each catalytic site.

| Cleaved Bond length (Å) |                     |             |          | Cleaved Bond length (Å) |                     |          |          |          |  |
|-------------------------|---------------------|-------------|----------|-------------------------|---------------------|----------|----------|----------|--|
| GGE                     |                     |             |          | SSE                     |                     |          |          |          |  |
| 1.42662 Å               |                     |             |          | 1.42469 Å               |                     |          |          |          |  |
| <b>Fe(II)</b>           |                     |             |          | <b>Fe(II)</b>           |                     |          |          |          |  |
|                         | <b>Bonding Site</b> |             |          |                         | <b>Bonding Site</b> |          |          |          |  |
|                         | <b>1</b>            | <b>2</b>    | <b>3</b> | <b>1</b>                | <b>2</b>            | <b>3</b> | <b>4</b> | <b>5</b> |  |
| Bond length             | 1.36741             | 1.43431     | 1.47949  | 1.41161                 | 1.4319              | 1.47686  | 1.43525  | 1.48417  |  |
| Gibbs Energy            | -239.370211         | -200.415707 | -301.52  | -288.659                | -230.465            | -313.96  | -228.521 | -295.47  |  |
| <b>Ca(II)</b>           |                     |             |          | <b>Ca(II)</b>           |                     |          |          |          |  |
|                         | <b>Bonding Site</b> |             |          |                         | <b>Bonding Site</b> |          |          |          |  |
|                         | <b>1</b>            | <b>2</b>    | <b>3</b> | <b>1</b>                | <b>2</b>            | <b>3</b> | <b>4</b> | <b>5</b> |  |
| Bond length             | 1.41911             | 1.42024     | 1.46465  | 1.41119                 | 1.422               | 1.46217  | 1.42412  | 1.4757   |  |
| Gibbs Energy            | -150.955448         | -118.389613 | -162.62  | -159.175                | -131.698            | -173.36  | -132.642 | -171.84  |  |
| <b>K(I)</b>             |                     |             |          | <b>K(I)</b>             |                     |          |          |          |  |
|                         | <b>Bonding Site</b> |             |          |                         | <b>Bonding Site</b> |          |          |          |  |
|                         | <b>1</b>            | <b>2</b>    | <b>3</b> | <b>1</b>                | <b>2</b>            | <b>3</b> | <b>4</b> | <b>5</b> |  |
| Bond length             | 1.41858             | 1.4247      | 1.44226  | 1.41886                 | 1.42456             | 1.44042  | 1.42606  | 1.4473   |  |
| Gibbs Energy            | -26.1508101         | -22.9837721 | -34.163  | -30.8559                | -32.2759            | -38.313  | -32.6192 | -37.333  |  |

GGE – Fe<sup>2+</sup> - position 1.

|   |             |             |             |
|---|-------------|-------------|-------------|
| C | -2.63842500 | 0.42204700  | 0.55914400  |
| C | -1.38905300 | 0.48331900  | -0.06711500 |
| C | -0.72222000 | 1.68505800  | -0.16850600 |
| C | -1.33362900 | 2.87128900  | 0.35997600  |
| C | -2.59501000 | 2.79275600  | 0.98111600  |
| C | -3.22404900 | 1.54570600  | 1.13624700  |
| H | -0.92948000 | -0.43087000 | -0.42347400 |
| H | -1.12423100 | 3.85980200  | -0.05962500 |
| O | -4.38081700 | 1.41018600  | 1.78896800  |
| C | 0.77577200  | 1.73290200  | -0.43193500 |
| H | 1.13580500  | 1.20100300  | -1.31339000 |
| O | 1.18711800  | 3.12437400  | -0.43232300 |
| H | 0.88366300  | 3.61073000  | -1.21330900 |
| C | 1.47064000  | 1.24111700  | 0.86987200  |
| H | 0.77521200  | 1.56338100  | 1.74837700  |
| C | 2.83724000  | 1.86156400  | 1.21835100  |
| H | 3.38510800  | 1.20011900  | 1.89080000  |
| H | 3.42383100  | 2.10744400  | 0.33358600  |
| O | 1.39854600  | -0.12438900 | 0.87170300  |
| O | 2.48266200  | 3.08255600  | 1.94096800  |
| H | 3.23535900  | 3.66227300  | 2.11580400  |
| C | 1.68367800  | -0.78327000 | 2.08123500  |
| C | 2.72503500  | -1.69184000 | 2.10182500  |
| C | 0.86904800  | -0.56737700 | 3.19702800  |
| C | 2.97801800  | -2.40746100 | 3.26771800  |
| H | 3.30713800  | -1.84774100 | 1.20092700  |
| C | 1.13653700  | -1.27901200 | 4.36148300  |
| C | 2.18556400  | -2.19512700 | 4.38789200  |
| H | 3.78455900  | -3.12842000 | 3.29405700  |
| H | 0.52738300  | -1.13954200 | 5.24456500  |
| H | 2.37558800  | -2.74983300 | 5.29819200  |
| O | -0.14690900 | 0.34630500  | 3.05330300  |
| C | -1.18209200 | 0.31996700  | 4.04228500  |
| H | -1.58697400 | -0.68923200 | 4.13825300  |
| H | -0.81062800 | 0.66992000  | 5.00720100  |
| H | -1.95874700 | 0.99274200  | 3.68353200  |
| H | -4.62856800 | 2.22621700  | 2.24332100  |

|    |             |             |             |
|----|-------------|-------------|-------------|
| H  | -3.16023800 | -0.52492000 | 0.64952600  |
| O  | -3.18314300 | 3.90963300  | 1.44535100  |
| C  | -4.28676400 | 4.42075500  | 0.64696000  |
| H  | -4.72992100 | 5.22053700  | 1.23316000  |
| H  | -3.90062800 | 4.81090600  | -0.29552500 |
| H  | -5.02021900 | 3.63522300  | 0.45409600  |
| Fe | 0.56070400  | 3.31714200  | 1.44879800  |

GGE – Fe<sup>2+</sup> - position 2.

|   |             |             |             |
|---|-------------|-------------|-------------|
| C | -2.79152800 | 0.14180800  | -0.56332200 |
| C | -1.46052600 | 0.50160200  | -0.37894900 |
| C | -1.11208600 | 1.78293700  | 0.05298700  |
| C | -2.10625100 | 2.73495500  | 0.28660000  |
| C | -3.42373500 | 2.37708900  | 0.08911100  |
| C | -3.75843600 | 1.09344300  | -0.32439700 |
| H | -0.68526800 | -0.22544700 | -0.58119200 |
| H | -1.81000200 | 3.73202200  | 0.58554200  |
| O | -5.13759900 | 0.87221400  | -0.49275200 |
| C | 0.33620400  | 2.19099500  | 0.24041600  |
| H | 0.91145600  | 1.80406500  | -0.61294600 |
| O | 0.36474600  | 3.59252200  | 0.28411500  |
| H | 1.27105300  | 3.87146300  | 0.48118700  |
| C | 0.93910400  | 1.61257600  | 1.54071200  |
| H | 0.48661400  | 2.13325100  | 2.38585600  |
| C | 2.46318900  | 1.74692500  | 1.56530600  |
| H | 2.84597000  | 1.41163200  | 2.53442100  |
| H | 2.88220600  | 1.10852900  | 0.77736700  |
| O | 0.59529300  | 0.22015200  | 1.55453600  |
| O | 2.76958800  | 3.10966300  | 1.34332100  |
| H | 3.72049900  | 3.25122200  | 1.35481900  |
| C | 1.14263800  | -0.65689200 | 2.42552300  |
| C | 1.50512600  | -1.90506500 | 1.92456000  |
| C | 1.28017300  | -0.38898700 | 3.82418700  |
| C | 2.02137700  | -2.87423400 | 2.76411400  |
| H | 1.38726800  | -2.08158400 | 0.86255000  |
| C | 1.81666000  | -1.37524600 | 4.65883300  |
| C | 2.18092000  | -2.60201300 | 4.13453500  |
| H | 2.31768700  | -3.83625900 | 2.36603100  |
| H | 1.93942200  | -1.18622700 | 5.71619000  |

H 2.59310000 -3.35909000 4.78986500  
O 0.86914000 0.81134100 4.23672300  
C 0.97924600 1.14023100 5.62485900  
H 0.38192100 0.45208400 6.22620700  
H 2.02424800 1.11268100 5.94013700  
H 0.59139000 2.15019700 5.71871600  
H -5.35216000 -0.00610300 -0.83618800  
H -3.05987200 -0.85336800 -0.90079200  
O -4.51598400 3.24042200 0.24757100  
C -4.25771500 4.63278700 0.58344200  
H -5.22761200 5.12775600 0.59141500  
H -3.78577000 4.68715800 1.56347000  
H -3.62782200 5.06210000 -0.19403100  
Fe -6.19680700 2.28308300 0.34923300

GGE – Fe<sup>2+</sup> - position 3.

C -2.37109600 0.33219700 -1.99075800  
C -1.48480900 1.39359900 -1.72239000  
C -1.13697200 1.68410300 -0.39171700  
C -1.72061500 0.94470500 0.66402300  
C -2.68334500 -0.05147400 0.40142500  
C -2.95074400 -0.41595000 -0.95589600  
H -1.02470400 1.93187000 -2.54206000  
H -1.42619400 1.18188700 1.67992900  
O -3.75367500 -1.42656400 -1.25190900  
C 0.06087300 2.54565700 -0.04384100  
H 0.29794600 3.19649200 -0.89274500  
O -0.29525900 3.26570400 1.09582100  
H 0.40842100 3.90393600 1.28321000  
C 1.29563100 1.64814700 0.28964000  
H 1.18705100 1.30866200 1.32470100  
C 2.58798900 2.44553800 0.09757600  
H 3.41687500 1.96771700 0.62247000  
H 2.81075300 2.50732700 -0.97521800  
O 1.27182400 0.43873700 -0.56220200  
O 2.31469300 3.72002700 0.63914400  
H 3.11504400 4.25268200 0.68556800  
C 2.19446000 -0.59108400 -0.26035300  
C 3.56110500 -0.46241600 -0.42398500

C 1.64385900 -1.81186800 0.12601900  
C 4.38057500 -1.54480700 -0.11268100  
H 3.98668100 0.45008400 -0.81765300  
C 2.44854000 -2.89202200 0.43376900  
C 3.82999800 -2.74017700 0.32804800  
H 5.45199600 -1.45179500 -0.23412400  
H 2.02937200 -3.84311400 0.73404900  
H 4.47162000 -3.57889400 0.56618300  
O 0.24071900 -1.86557100 0.10439900  
C -0.41457400 -3.03193700 0.66087100  
H -0.19067300 -3.89997200 0.04246300  
H -0.07542000 -3.17488500 1.68627300  
H -1.48116100 -2.81716900 0.63579500  
H -4.21325700 -1.76077900 -0.46674100  
H -2.59406200 0.03658600 -3.01104600  
O -3.30335300 -0.78823700 1.29563800  
C -3.20595200 -0.45355400 2.70201200  
H -3.90247400 -1.11904300 3.20175200  
H -2.18929700 -0.63583000 3.05338700  
H -3.49990300 0.58540600 2.85197300  
Fe -0.56106600 -0.29945700 -0.72330200

SSE – Fe<sup>2+</sup> - position 1.

C -2.88288600 2.78639800 2.24539000  
C -1.99970500 1.64757400 2.24304400  
C -1.51355200 1.17700100 1.07624400  
C -1.87183700 1.80406200 -0.18881900  
C -2.66915500 3.01839100 -0.14349600  
C -3.10450400 3.54747200 1.06885100  
H -1.76075200 1.21719500 3.20938000  
H -2.33491700 1.09139600 -0.89224600  
O -3.80699400 4.72152200 1.12019300  
C -0.39787900 0.16733900 0.98825400  
H -0.62364800 -0.77668600 1.49100600  
O -0.19161100 -0.10093800 -0.41273300  
H 0.48412600 -0.85232100 -0.50762700  
C 0.91978000 0.76731000 1.57024800  
H 0.89474900 0.69938300 2.66351500  
C 1.18528700 2.21610600 1.19151700

|                                      |             |             |             |   |             |             |             |
|--------------------------------------|-------------|-------------|-------------|---|-------------|-------------|-------------|
| H                                    | 0.38529500  | 2.89139000  | 1.48632300  | C | -1.29688200 | 0.79791700  | -0.31631300 |
| H                                    | 2.12441100  | 2.54006800  | 1.63952700  | C | -1.07215600 | 2.10147200  | 0.15254600  |
| O                                    | 2.01353400  | 0.05598100  | 1.03139600  | C | -2.11992900 | 3.00664500  | 0.33633400  |
| O                                    | 1.31426700  | 2.34813300  | -0.25389600 | C | -3.39859000 | 2.57308600  | 0.04958900  |
| H                                    | 2.19208400  | 2.01731700  | -0.50023400 | C | -3.62469300 | 1.28363700  | -0.39815500 |
| C                                    | 2.26008400  | -1.19472700 | 1.57292100  | H | -0.45979000 | 0.12193200  | -0.44069100 |
| C                                    | 2.83233800  | -1.30143800 | 2.84469000  | H | -1.89522400 | 4.00926200  | 0.67369800  |
| C                                    | 2.00201600  | -2.32718500 | 0.80598400  | O | -4.94156000 | 0.92736300  | -0.68488800 |
| C                                    | 3.15537000  | -2.56553900 | 3.33551900  | C | 0.33841100  | 2.56521700  | 0.45253500  |
| C                                    | 2.32608500  | -3.58832100 | 1.28971200  | H | 0.98074800  | 2.24878700  | -0.38186600 |
| C                                    | 2.90424000  | -3.68424800 | 2.55129800  | O | 0.30934200  | 3.96068700  | 0.57266300  |
| H                                    | 3.60752200  | -2.68339700 | 4.31037700  | H | 1.20454800  | 4.25805500  | 0.78953100  |
| H                                    | 2.14196200  | -4.48186100 | 0.71067200  | C | 0.89179900  | 1.93405500  | 1.75540400  |
| H                                    | 3.16442400  | -4.66314800 | 2.93389600  | H | 0.42708600  | 2.43866600  | 2.60470800  |
| O                                    | 1.41717300  | -2.09332000 | -0.42408900 | C | 2.41638600  | 2.04377300  | 1.81408100  |
| C                                    | 1.26802000  | -3.21246500 | -1.31361500 | H | 2.77569800  | 1.73961900  | 2.80056800  |
| H                                    | 2.24257200  | -3.66346300 | -1.50077600 | H | 2.84068400  | 1.37611000  | 1.05287000  |
| H                                    | 0.57735200  | -3.94400800 | -0.89249500 | O | 0.50381300  | 0.55627100  | 1.71649900  |
| H                                    | 0.86472600  | -2.81089600 | -2.24019900 | O | 2.73962400  | 3.39544000  | 1.54770300  |
| H                                    | -3.22170300 | 5.46493700  | 1.30723300  | H | 3.68380900  | 3.54624000  | 1.64467900  |
| O                                    | -2.90684000 | 3.51174000  | -1.33778800 | C | 1.08975600  | -0.39013300 | 2.46921100  |
| C                                    | -3.98672700 | 4.44154800  | -1.62790800 | C | 1.41104500  | -1.60479600 | 1.81250700  |
| H                                    | -4.12496300 | 4.36452900  | -2.70218700 | C | 1.31043100  | -0.25545700 | 3.86247100  |
| H                                    | -4.88689900 | 4.14117900  | -1.09685300 | C | 1.98006800  | -2.64557200 | 2.53111200  |
| H                                    | -3.69483000 | 5.45118900  | -1.35163000 | C | 1.88919700  | -1.30300900 | 4.56737100  |
| Fe                                   | -0.18206900 | 1.62840700  | -1.29753900 | C | 2.21635700  | -2.47858500 | 3.89577600  |
| O                                    | 3.01901500  | -0.13129600 | 3.49172000  | H | 2.24909100  | -3.57606500 | 2.05245100  |
| C                                    | 3.71085900  | -0.17330000 | 4.74211100  | H | 2.07673200  | -1.22115300 | 5.62833800  |
| H                                    | 3.80414000  | 0.85956200  | 5.06586500  | H | 2.66683600  | -3.29160700 | 4.45181500  |
| H                                    | 3.14026400  | -0.74134800 | 5.48005300  | O | 0.92027900  | 0.91667800  | 4.39077400  |
| H                                    | 4.70342900  | -0.60956500 | 4.61413100  | C | 1.10292900  | 1.11395100  | 5.79325700  |
| O                                    | -3.36228400 | 3.06478900  | 3.41876800  | H | 0.54268100  | 0.36730900  | 6.36016900  |
| C                                    | -4.48710100 | 3.94806100  | 3.68260200  | H | 2.16315300  | 1.06688800  | 6.05246300  |
| H                                    | -4.82524200 | 3.65015100  | 4.67026300  | H | 0.71588300  | 2.10661700  | 6.00503700  |
| H                                    | -4.15276100 | 4.98239000  | 3.69139600  | H | -4.97972000 | -0.00745100 | -0.96250500 |
| H                                    | -5.26361300 | 3.79463300  | 2.93796400  | O | -4.56760400 | 3.33470800  | 0.15529700  |
|                                      |             |             |             | C | -4.44307100 | 4.73483900  | 0.53512100  |
| SSE – Fe <sup>2+</sup> - position 2. |             |             |             | H | -5.44646300 | 5.15370100  | 0.48631300  |
| C                                    | -2.58974600 | 0.37561100  | -0.58607500 | H | -4.03836000 | 4.80033000  | 1.54415100  |

H -3.79777500 5.22657800 -0.19094900  
Fe -6.12657100 2.16838200 0.22541200  
O 1.13054400 -1.62899200 0.49296400  
C 1.55813800 -2.77314100 -0.24375700  
H 1.31108600 -2.56994500 -1.28303000  
H 2.63740300 -2.91156700 -0.14843200  
H 1.03535500 -3.67109800 0.09578900  
O -3.00385900 -0.82815100 -1.02259400  
C -2.00103200 -1.81807400 -1.29435500  
H -2.54055500 -2.70841700 -1.60341000  
H -1.35179500 -1.47312200 -2.10160100  
H -1.41944100 -2.01703900 -0.39187900

SSE – Fe<sup>2+</sup> - position 3.

C -2.65258600 0.38877000 -0.81859300  
C -1.31633600 0.79568800 -1.08669500  
C -0.74362000 1.89316700 -0.42927000  
C -1.47192100 2.58056300 0.56162600  
C -2.79642700 2.18179900 0.85637100  
C -3.34234900 1.01456400 0.26728800  
H -0.76520900 0.23025500 -1.82867000  
H -1.00677000 3.42007000 1.06280500  
O -4.54382000 0.56523500 0.64480300  
C 0.74501600 2.18552500 -0.49328800  
H 1.16647300 1.75245800 -1.40812300  
O 0.86165300 3.57548900 -0.45591700  
H 1.80354200 3.80096400 -0.48704500  
C 1.45698200 1.57284600 0.75309900  
H 1.26178000 2.23485900 1.60452100  
C 2.95758900 1.44825000 0.50682100  
H 3.47509900 1.16699800 1.42645300  
H 3.14142400 0.69012600 -0.25890900  
O 0.83114000 0.27208200 1.06525900  
O 3.34615400 2.73865100 0.07256400  
H 4.30014800 2.78747800 -0.04037300  
C 1.21394500 -0.35521100 2.26877300  
C 2.37047400 -1.13755300 2.36594000  
C 0.31094300 -0.29916500 3.32781600  
C 2.65556300 -1.73364300 3.59963800

C 0.57911000 -0.89323000 4.54484700  
C 1.78023700 -1.59070500 4.66465900  
H 3.55214500 -2.32539800 3.72118900  
H -0.11374700 -0.84712900 5.37303000  
H 2.01861900 -2.06349500 5.60923300  
O -0.90589900 0.32384400 3.01471700  
C -1.85088300 0.56771000 4.08105500  
H -2.21281900 -0.38255200 4.47257100  
H -1.36610700 1.15641400 4.85926900  
H -2.67028800 1.12624000 3.63149700  
H -4.97631200 1.20292600 1.23267900  
O -3.58062300 2.73820500 1.76532400  
C -3.20503300 4.00494000 2.35465300  
H -4.05924800 4.30430100 2.95404200  
H -2.32649600 3.87325200 2.98877100  
H -3.01943000 4.73726800 1.56876900  
Fe -1.14510800 0.50234200 1.07069800  
O 3.10605300 -1.26025200 1.25728900  
C 4.27550400 -2.08872500 1.30417800  
H 4.69286700 -2.06022100 0.30171700  
H 4.99798600 -1.69148300 2.01987000  
H 4.00484900 -3.11425100 1.56107700  
O -3.07534900 -0.63847700 -1.49803600  
C -4.45435400 -1.10998700 -1.53650200  
H -4.45729700 -1.82476200 -2.35311100  
H -4.70971500 -1.59069500 -0.59622100  
H -5.12130000 -0.27832500 -1.75059900

SSE – Fe<sup>2+</sup> - position 4.

C -2.67365200 0.26412900 -0.14008300  
C -1.36643100 0.63179900 -0.36784200  
C -0.95558000 1.88204100 0.10205000  
C -1.83437200 2.73604700 0.77570700  
C -3.14610300 2.34374000 1.01339600  
C -3.54315400 1.09786000 0.54172200  
H -0.67597900 -0.03263100 -0.87272200  
H -1.46574500 3.70174300 1.09780900  
O -4.85684000 0.64722500 0.72113800  
C 0.48105000 2.31341100 -0.09298200

|    |             |             |             |                                      |             |             |             |
|----|-------------|-------------|-------------|--------------------------------------|-------------|-------------|-------------|
| H  | 0.79101700  | 2.03505000  | -1.11090700 | H                                    | -3.77376900 | -2.12657100 | -2.16560500 |
| O  | 0.53895700  | 3.69821200  | 0.10024600  | H                                    | -3.96033700 | -0.34760300 | -2.41740900 |
| H  | 1.46920900  | 3.96911200  | 0.10518700  | H                                    | -2.33280600 | -1.10857500 | -2.41913700 |
| C  | 1.41403100  | 1.59886400  | 0.91169900  |                                      |             |             |             |
| H  | 1.20332500  | 1.99642200  | 1.90671200  | SSE – Fe <sup>2+</sup> - position 5. |             |             |             |
| C  | 2.88817200  | 1.77479000  | 0.55290900  | C                                    | -1.16344400 | 0.38298900  | -1.40165600 |
| H  | 3.49504700  | 1.28981900  | 1.32581900  | C                                    | -0.29241700 | 1.36877300  | -0.86167000 |
| H  | 3.07795400  | 1.28073400  | -0.40636700 | C                                    | -0.73633700 | 2.18826600  | 0.20021700  |
| O  | 1.16297200  | 0.18661600  | 0.86205800  | C                                    | -2.05668000 | 2.15404100  | 0.57570300  |
| O  | 3.14670500  | 3.16448000  | 0.48645000  | C                                    | -2.94288700 | 1.27925100  | -0.09420400 |
| H  | 4.07033300  | 3.33102900  | 0.27802000  | C                                    | -2.48665900 | 0.31605300  | -1.04127400 |
| C  | 1.26610200  | -0.52446600 | 2.00132500  | H                                    | 0.55110900  | 1.68904900  | -1.48181700 |
| C  | 2.22455600  | -1.57764400 | 2.04703200  | H                                    | -2.40034400 | 2.79456700  | 1.37779400  |
| C  | 0.43295600  | -0.27812200 | 3.11141200  | O                                    | -3.28364500 | -0.68441800 | -1.46148000 |
| C  | 2.35382900  | -2.34233700 | 3.20663400  | C                                    | 0.31196500  | 3.01988700  | 0.87178100  |
| C  | 0.58998900  | -1.02950500 | 4.26609400  | H                                    | 0.83039300  | 3.58595400  | 0.08725400  |
| C  | 1.54841000  | -2.05216100 | 4.29625400  | O                                    | -0.29203300 | 3.88831200  | 1.78081900  |
| H  | 3.08128200  | -3.13888900 | 3.26907500  | H                                    | 0.33794000  | 4.58408500  | 2.00821600  |
| H  | -0.01737200 | -0.84489900 | 5.14091400  | C                                    | 1.40855200  | 2.16995400  | 1.62484000  |
| H  | 1.65820500  | -2.63480600 | 5.20274100  | H                                    | 1.21207200  | 2.31473500  | 2.68523700  |
| O  | -0.48725500 | 0.70125900  | 2.93537500  | C                                    | 2.78522100  | 2.70569400  | 1.26891100  |
| C  | -1.21722900 | 1.12431100  | 4.07870500  | H                                    | 3.54635900  | 2.21903900  | 1.87886700  |
| H  | -1.85682800 | 0.32026600  | 4.45471400  | H                                    | 2.99531500  | 2.51795200  | 0.20488800  |
| H  | -0.54436500 | 1.45902600  | 4.87209900  | O                                    | 1.41934300  | 0.70126400  | 1.41130900  |
| H  | -1.83232400 | 1.95834800  | 3.74667000  | O                                    | 2.67419500  | 4.08825500  | 1.53480400  |
| H  | -5.36773200 | 1.30276300  | 1.23215300  | H                                    | 3.52076300  | 4.53113200  | 1.42452600  |
| O  | -4.12165700 | 3.01875700  | 1.64642400  | C                                    | 1.16702500  | -0.08891900 | 2.55215500  |
| C  | -3.84574300 | 4.36814600  | 2.06063900  | C                                    | 0.23403200  | -1.11076900 | 2.42050900  |
| H  | -4.76907100 | 4.73842300  | 2.49560100  | C                                    | 1.87005600  | 0.06505900  | 3.75420800  |
| H  | -3.04941900 | 4.37441800  | 2.80697800  | C                                    | -0.08457200 | -1.95415500 | 3.46823000  |
| H  | -3.56702200 | 4.97219400  | 1.19606700  | C                                    | 1.54462400  | -0.77489300 | 4.82280600  |
| Fe | -4.73507700 | -1.29388700 | 0.63229900  | C                                    | 0.57764700  | -1.75692100 | 4.67602600  |
| O  | 2.95281700  | -1.71687400 | 0.94302600  | H                                    | -0.80968000 | -2.74852800 | 3.36461000  |
| C  | 3.96369400  | -2.72632200 | 0.91757000  | H                                    | 2.05939700  | -0.67108700 | 5.76764800  |
| H  | 4.42635600  | -2.65292000 | -0.06212600 | H                                    | 0.34498700  | -2.40014800 | 5.51516100  |
| H  | 4.70720700  | -2.54187000 | 1.69614200  | O                                    | 2.81024000  | 1.01996200  | 3.78443000  |
| H  | 3.51800400  | -3.71509400 | 1.04638300  | C                                    | 3.57100300  | 1.18911500  | 4.98839800  |
| O  | -3.23466600 | -0.96346300 | -0.55349200 | H                                    | 2.91844500  | 1.47182400  | 5.81621300  |
| C  | -3.33792400 | -1.14196000 | -2.00480900 | H                                    | 4.11867900  | 0.27486900  | 5.22270600  |

|    |             |             |             |   |             |             |             |
|----|-------------|-------------|-------------|---|-------------|-------------|-------------|
| H  | 4.26980000  | 1.99442600  | 4.78047800  | O | 1.52654000  | 2.67046600  | -0.09322800 |
| H  | -4.20176900 | -0.50364400 | -1.21136200 | H | 2.34174200  | 3.18488900  | -0.13940900 |
| O  | -4.22569400 | 1.15920700  | 0.17280800  | C | 2.23731900  | -0.36435800 | 2.64783200  |
| C  | -4.86308100 | 2.04831300  | 1.11567500  | C | 3.57045400  | -0.11334000 | 2.90860800  |
| H  | -5.91302000 | 1.77386000  | 1.10206000  | C | 1.44073000  | -1.10253300 | 3.53231800  |
| H  | -4.44394100 | 1.89442500  | 2.11055000  | C | 4.14052300  | -0.59631300 | 4.08420300  |
| H  | -4.73615400 | 3.08030500  | 0.78799400  | H | 4.15862300  | 0.43147200  | 2.17902800  |
| Fe | 0.72570100  | -0.26644800 | -0.20411600 | C | 2.01462800  | -1.57611100 | 4.70693600  |
| O  | -0.29945500 | -1.24696500 | 1.13256000  | C | 3.35918500  | -1.31952500 | 4.97340800  |
| C  | -1.36835700 | -2.19836100 | 0.92667000  | H | 5.18579100  | -0.41298100 | 4.29483000  |
| H  | -1.66181400 | -2.10648000 | -0.11582700 | H | 1.43223900  | -2.15369100 | 5.41189500  |
| H  | -1.00518700 | -3.20464000 | 1.13334800  | H | 3.79410100  | -1.70116200 | 5.88853200  |
| H  | -2.20296000 | -1.93644800 | 1.57674700  | O | 0.14587900  | -1.28978000 | 3.15144900  |
| O  | -0.39805400 | -0.62434000 | -1.94817600 | C | -0.65311700 | -2.14682400 | 3.96882900  |
| C  | -0.92317700 | -1.57881900 | -2.92512400 | H | -0.20148700 | -3.13826000 | 4.03821200  |
| H  | -0.05218200 | -2.10469900 | -3.30473000 | H | -0.78142600 | -1.72208300 | 4.96663400  |
| H  | -1.62702500 | -2.25415800 | -2.44586400 | H | -1.61930900 | -2.21998300 | 3.47597500  |
| H  | -1.40737900 | -1.01188600 | -3.71776900 | H | -4.64530100 | 4.70356300  | -0.73549900 |

GGE – Ca<sup>2+</sup> - position 1.

|   |             |             |             |
|---|-------------|-------------|-------------|
| C | -3.13960900 | 2.06024100  | -1.61131600 |
| C | -2.17856700 | 1.18149900  | -1.09887300 |
| C | -1.52588200 | 1.45251700  | 0.11571400  |
| C | -1.92330000 | 2.57682000  | 0.85901000  |
| C | -2.91906400 | 3.42522100  | 0.38015800  |
| C | -3.50922700 | 3.18824600  | -0.88808100 |
| H | -1.99123400 | 0.24104400  | -1.61284000 |
| H | -1.50206100 | 2.76444800  | 1.83772300  |
| O | -4.42698200 | 4.01046000  | -1.37607700 |
| C | -0.42898300 | 0.50428000  | 0.57470900  |
| H | -0.84218000 | -0.40052900 | 1.02715200  |
| O | 0.27177100  | 0.10006500  | -0.64197500 |
| H | 0.99784200  | -0.48153400 | -0.35254300 |
| C | 0.63912800  | 1.03286100  | 1.55156300  |
| H | 0.21282000  | 1.02819600  | 2.56015000  |
| C | 1.22718100  | 2.42069300  | 1.32048700  |
| H | 0.56888200  | 3.22020900  | 1.65575000  |
| H | 2.16196300  | 2.47016700  | 1.88142500  |
| O | 1.67643100  | 0.07036100  | 1.44444100  |

GGE – Ca<sup>2+</sup> - position 2.

|   |             |            |             |
|---|-------------|------------|-------------|
| C | -2.62666600 | 0.25096800 | -0.97116500 |
| C | -1.28736800 | 0.67451700 | -1.00335700 |
| C | -0.85568700 | 1.71786900 | -0.18382000 |
| C | -1.78509300 | 2.38179700 | 0.64159400  |
| C | -3.13106900 | 2.00510400 | 0.64081200  |
| C | -3.55475300 | 0.90287500 | -0.15694900 |
| H | -0.59006800 | 0.18639100 | -1.67603200 |
| H | -1.44490200 | 3.23374700 | 1.22028400  |
| O | -4.82289000 | 0.50089300 | -0.14618700 |
| C | 0.60213800  | 2.11955200 | -0.11111500 |
| H | 1.09380400  | 1.82496800 | -1.04655700 |
| O | 0.63616100  | 3.50450900 | 0.08082700  |

|    |             |             |             |   |             |             |             |
|----|-------------|-------------|-------------|---|-------------|-------------|-------------|
| H  | 1.55986200  | 3.79239200  | 0.05352600  | C | -3.59170000 | 1.07933800  | 0.65774000  |
| C  | 1.33147900  | 1.43668200  | 1.07849700  | H | -0.76979700 | -0.41443400 | -0.42660800 |
| H  | 1.10930600  | 2.01932700  | 1.97992200  | H | -1.38003200 | 3.67846300  | 0.65015400  |
| C  | 2.83580700  | 1.36972300  | 0.83018100  | O | -4.97935800 | 0.87587700  | 0.86157300  |
| H  | 3.36330100  | 1.05482400  | 1.73506200  | C | 0.51332500  | 2.00076000  | -0.18613500 |
| H  | 3.02880300  | 0.64638500  | 0.02749400  | H | 0.77660200  | 1.54293500  | -1.15132800 |
| O  | 0.79296300  | 0.08883700  | 1.27473000  | O | 0.61346100  | 3.39900400  | -0.23897300 |
| O  | 3.20246800  | 2.67702100  | 0.44619900  | H | 1.55199400  | 3.64025200  | -0.17641500 |
| H  | 4.15556700  | 2.75049700  | 0.33661800  | C | 1.44066700  | 1.40007800  | 0.89055600  |
| C  | 1.25201100  | -0.58479500 | 2.41682900  | H | 1.21638800  | 1.88407200  | 1.84695100  |
| C  | 2.33894200  | -1.44506200 | 2.36070000  | C | 2.91537400  | 1.57811100  | 0.54021600  |
| C  | 0.53935200  | -0.41622000 | 3.60992700  | H | 3.51807300  | 1.13126400  | 1.33650300  |
| C  | 2.73995500  | -2.10568600 | 3.51551100  | H | 3.12361800  | 1.05612600  | -0.40064000 |
| H  | 2.85994100  | -1.58116400 | 1.42010100  | O | 1.15613500  | 0.00959400  | 0.94239300  |
| C  | 0.93672600  | -1.07814700 | 4.76312300  | O | 3.16625200  | 2.97126400  | 0.42395100  |
| C  | 2.04880300  | -1.91241300 | 4.70888000  | H | 4.10305700  | 3.13810500  | 0.28851400  |
| H  | 3.59226000  | -2.77231600 | 3.48402400  | C | 1.43099000  | -0.60803900 | 2.14829200  |
| H  | 0.39477300  | -0.95085000 | 5.69182700  | C | 2.48246700  | -1.50170000 | 2.24193700  |
| H  | 2.36681900  | -2.42645900 | 5.60725900  | C | 0.60201200  | -0.36175300 | 3.25157700  |
| O  | -0.60440700 | 0.38678000  | 3.53459500  | C | 2.73813100  | -2.15359100 | 3.44606100  |
| C  | -0.94412800 | 1.15523700  | 4.71714500  | H | 3.08829300  | -1.68141100 | 1.36129400  |
| H  | -1.36683200 | 0.50314700  | 5.47997500  | C | 0.86737000  | -1.00257100 | 4.45636900  |
| H  | -0.04853200 | 1.65526800  | 5.08453100  | C | 1.93551600  | -1.89512600 | 4.54640200  |
| H  | -1.68395400 | 1.88760200  | 4.40216300  | H | 3.56080200  | -2.85281700 | 3.51900200  |
| H  | -5.38203300 | 1.13649400  | 0.32608200  | H | 0.25286900  | -0.82463300 | 5.32858900  |
| H  | -2.98613400 | -0.53852700 | -1.62299100 | H | 2.13011900  | -2.38957900 | 5.48970800  |
| O  | -4.11666700 | 2.58613700  | 1.32803800  | O | -0.43318500 | 0.51185300  | 3.04104400  |
| C  | -3.89171600 | 3.88410600  | 1.90693500  | C | -1.22070300 | 0.84434800  | 4.16748000  |
| H  | -4.85911100 | 4.21025100  | 2.27599800  | H | -1.73621200 | -0.03389000 | 4.56688000  |
| H  | -3.18385900 | 3.81325200  | 2.73507900  | H | -0.61658900 | 1.30090200  | 4.95622700  |
| H  | -3.52563400 | 4.57279700  | 1.14411700  | H | -1.95713000 | 1.56711700  | 3.81549800  |
| Ca | -1.48232900 | -0.24373100 | 1.49098000  | H | -5.17394900 | 0.11128300  | 1.42164000  |

GGE – Ca<sup>2+</sup> - position 3.

|   |             |            |             |    |             |             |             |
|---|-------------|------------|-------------|----|-------------|-------------|-------------|
| C | -2.75888900 | 0.07036500 | 0.18710700  | H  | -3.15052900 | -0.93026100 | 0.04000000  |
| C | -1.43165600 | 0.36542700 | -0.07335400 | O  | -4.03986000 | 3.36895500  | 1.19823500  |
| C | -0.93155200 | 1.66363000 | 0.10832900  | C  | -3.61517400 | 4.34405200  | 2.20054300  |
| C | -1.77843700 | 2.67604100 | 0.54476100  | H  | -4.51202900 | 4.87616700  | 2.50716200  |
| C | -3.10436900 | 2.38063300 | 0.83208400  | H  | -3.18210200 | 3.80348900  | 3.03980200  |
|   |             |            |             | H  | -2.89522300 | 5.02904300  | 1.75817300  |
|   |             |            |             | Ca | -5.48334800 | 2.69124000  | -0.34023200 |



SSE – Ca<sup>2+</sup> - position 1.

|   |             |             |             |
|---|-------------|-------------|-------------|
| C | -3.44663400 | 2.02170200  | -0.76160000 |
| C | -2.50304000 | 1.01729000  | -0.54074000 |
| C | -1.46017700 | 1.22689800  | 0.38816900  |
| C | -1.40532500 | 2.42296900  | 1.09328000  |
| C | -2.33249900 | 3.46241800  | 0.86185400  |
| C | -3.32567300 | 3.28232300  | -0.11712600 |
| H | -2.56787600 | 0.07566700  | -1.07300500 |
| H | -0.63465200 | 2.62460800  | 1.82618800  |
| O | -4.17100800 | 4.27312500  | -0.40975700 |
| C | -0.27940300 | 0.27400800  | 0.29958200  |
| H | -0.57767300 | -0.75640900 | 0.50216500  |
| O | 0.12149700  | 0.38299800  | -1.11299100 |
| H | 0.75843100  | -0.31436800 | -1.32570800 |
| C | 0.94610700  | 0.56527200  | 1.16932300  |
| H | 0.62208900  | 0.80945300  | 2.18518500  |
| C | 1.93449800  | 1.60140000  | 0.59842200  |
| H | 2.61758500  | 1.91647800  | 1.38594900  |
| H | 2.52092100  | 1.11646900  | -0.17998100 |
| O | 1.70336100  | -0.62553100 | 1.16463200  |
| O | 1.29964900  | 2.78520000  | 0.00833900  |
| H | 1.71619800  | 3.57657200  | 0.36816800  |
| C | 2.09099400  | -1.11059500 | 2.40214100  |
| C | 3.41688800  | -0.95778400 | 2.80829400  |
| C | 1.15386600  | -1.77444900 | 3.19285900  |
| C | 3.81952400  | -1.52748600 | 4.01648500  |
| C | 1.55536800  | -2.33440800 | 4.40287100  |
| C | 2.88593700  | -2.20830300 | 4.78805600  |
| H | 4.84139000  | -1.44458400 | 4.35808900  |
| H | 0.85905300  | -2.86573500 | 5.03567400  |
| H | 3.20334800  | -2.65027600 | 5.72422200  |
| O | -0.11260000 | -1.79785600 | 2.69033900  |
| C | -1.07588800 | -2.56088000 | 3.41371800  |
| H | -0.75961000 | -3.60282200 | 3.49364900  |
| H | -1.23597000 | -2.14149600 | 4.40943300  |
| H | -1.99889500 | -2.50444500 | 2.84162400  |
| H | -4.88311500 | 3.94907600  | -0.98226500 |
| O | -2.13902700 | 4.59183300  | 1.54040100  |

|    |             |             |             |
|----|-------------|-------------|-------------|
| C  | -3.26601200 | 5.38972600  | 1.98704400  |
| H  | -2.88318200 | 5.96106300  | 2.82736400  |
| H  | -3.60235300 | 6.05036200  | 1.19274000  |
| H  | -4.07574200 | 4.73746600  | 2.31345400  |
| Ca | -0.46029100 | 2.61196800  | -1.44949100 |
| O  | 4.20764000  | -0.23916300 | 1.97565800  |
| C  | 5.60098600  | -0.19895000 | 2.27692800  |
| H  | 6.06777900  | 0.35225400  | 1.46482600  |
| H  | 5.78094600  | 0.31745100  | 3.22263200  |
| H  | 6.01437900  | -1.20877000 | 2.31795400  |
| O  | -4.49204100 | 1.95474600  | -1.58852800 |
| C  | -4.83642300 | 0.69533600  | -2.18696500 |
| H  | -4.98062700 | -0.05899500 | -1.41195800 |
| H  | -5.76772200 | 0.86853100  | -2.71714600 |
| H  | -4.06232000 | 0.38632900  | -2.89252100 |

SSE – Ca<sup>2+</sup> - position 2.

|   |             |             |             |
|---|-------------|-------------|-------------|
| C | -3.00348900 | 0.58979600  | 0.28105500  |
| C | -1.66657300 | 0.75658800  | -0.03435000 |
| C | -1.09088400 | 2.03272500  | 0.00008500  |
| C | -1.86164700 | 3.15727400  | 0.29295900  |
| C | -3.20452700 | 2.99082900  | 0.59097800  |
| C | -3.77729300 | 1.71866100  | 0.57920600  |
| H | -1.04353400 | -0.09767400 | -0.25687000 |
| H | -1.38861100 | 4.13102100  | 0.28681200  |
| O | -5.14456900 | 1.55505200  | 0.86579400  |
| C | 0.39092400  | 2.22191000  | -0.27394200 |
| H | 0.62655000  | 1.72711300  | -1.22779400 |
| O | 0.62777300  | 3.60147700  | -0.34713900 |
| H | 1.55566400  | 3.77939700  | -0.12031900 |
| C | 1.24304000  | 1.52831000  | 0.81212300  |
| H | 0.94371300  | 1.89681000  | 1.80071400  |
| C | 2.74092500  | 1.74475600  | 0.60519600  |
| H | 3.28120900  | 1.16517400  | 1.35775600  |
| H | 3.02503400  | 1.37817800  | -0.38693800 |
| O | 0.96471100  | 0.13951500  | 0.68617700  |
| O | 3.00118400  | 3.13650900  | 0.74603900  |
| H | 3.94606400  | 3.30705800  | 0.70409100  |
| C | 1.24847200  | -0.64045500 | 1.78529900  |

|                                      |             |             |             |    |             |             |             |
|--------------------------------------|-------------|-------------|-------------|----|-------------|-------------|-------------|
| C                                    | 2.40008400  | -1.43622100 | 1.79307100  | H  | -1.37016300 | 3.34955400  | 1.31150000  |
| C                                    | 0.34450400  | -0.69195700 | 2.84869300  | O  | -4.81778600 | 0.64000000  | 0.04615400  |
| C                                    | 2.64453500  | -2.27402000 | 2.88397600  | C  | 0.62769300  | 2.20865200  | -0.08742700 |
| C                                    | 0.59360500  | -1.51859900 | 3.94136200  | H  | 1.08456000  | 1.92542500  | -1.04359300 |
| C                                    | 1.74470100  | -2.29902000 | 3.94008200  | O  | 0.70124000  | 3.58837700  | 0.13395200  |
| H                                    | 3.52654300  | -2.89757900 | 2.91570800  | H  | 1.63409900  | 3.84645500  | 0.11987000  |
| H                                    | -0.08549400 | -1.56432800 | 4.78088000  | C  | 1.37565200  | 1.48009500  | 1.06282800  |
| H                                    | 1.94354600  | -2.94490500 | 4.78608700  | H  | 1.20293700  | 2.05331600  | 1.98119200  |
| O                                    | -0.76296000 | 0.10134500  | 2.71019500  | C  | 2.86706300  | 1.38207500  | 0.76406200  |
| C                                    | -1.65064200 | 0.16436500  | 3.81176900  | H  | 3.40464700  | 0.96950200  | 1.62344700  |
| H                                    | -2.10116300 | -0.81145000 | 4.01651700  | H  | 3.01825700  | 0.72702300  | -0.09961600 |
| H                                    | -1.14391400 | 0.52598700  | 4.71017600  | O  | 0.80237600  | 0.14905400  | 1.25679900  |
| H                                    | -2.42931400 | 0.87271800  | 3.52809300  | O  | 3.26273300  | 2.71262100  | 0.49486800  |
| H                                    | -5.29876000 | 0.61791100  | 1.08871300  | H  | 4.20759400  | 2.76155600  | 0.32215200  |
| O                                    | -4.08500800 | 4.06340500  | 0.83792100  | C  | 1.24607300  | -0.54851300 | 2.38306300  |
| C                                    | -3.59544500 | 5.12041300  | 1.72035700  | C  | 2.29564400  | -1.47813300 | 2.28296200  |
| H                                    | -4.45558500 | 5.74006100  | 1.96045700  | C  | 0.58364100  | -0.35594900 | 3.59917200  |
| H                                    | -3.19092200 | 4.65469100  | 2.61700500  | C  | 2.68259900  | -2.16393900 | 3.43649400  |
| H                                    | -2.83746300 | 5.70128000  | 1.19980300  | C  | 0.96654400  | -1.03812500 | 4.74319000  |
| Ca                                   | -5.63612100 | 3.24626400  | -0.51237000 | C  | 2.02939000  | -1.92964800 | 4.64086600  |
| O                                    | 3.20134500  | -1.31536700 | 0.71488600  | H  | 3.49314000  | -2.87862200 | 3.40033200  |
| C                                    | 4.35634000  | -2.14464500 | 0.65226000  | H  | 0.45829100  | -0.88887400 | 5.68620200  |
| H                                    | 4.83615300  | -1.91425600 | -0.29511700 | H  | 2.34839400  | -2.46951400 | 5.52376300  |
| H                                    | 5.04127900  | -1.92360700 | 1.47464300  | O  | -0.51769700 | 0.50363800  | 3.54685400  |
| H                                    | 4.07707200  | -3.20061200 | 0.67369900  | C  | -0.78242400 | 1.30037500  | 4.72785400  |
| O                                    | -3.68221000 | -0.56588700 | 0.39021400  | H  | -1.21174300 | 0.67866700  | 5.51210700  |
| C                                    | -2.91767200 | -1.78808700 | 0.35107200  | H  | 0.14704500  | 1.76041100  | 5.06170000  |
| H                                    | -3.61838300 | -2.58056700 | 0.59522500  | H  | -1.49518200 | 2.06388700  | 4.42487300  |
| H                                    | -2.51445800 | -1.94117500 | -0.65054700 | H  | -5.34283600 | 1.28728600  | 0.54094800  |
| H                                    | -2.11423300 | -1.73972700 | 1.08894300  | O  | -4.04517000 | 2.71072800  | 1.47834200  |
|                                      |             |             |             | C  | -3.78995400 | 3.98889300  | 2.08545300  |
|                                      |             |             |             | H  | -4.74142600 | 4.31149500  | 2.49681000  |
|                                      |             |             |             | H  | -3.05481600 | 3.89004800  | 2.88641400  |
|                                      |             |             |             | H  | -3.44400600 | 4.69737200  | 1.33162600  |
| SSE – Ca <sup>2+</sup> - position 3. |             |             |             | Ca | -1.46331100 | -0.12577000 | 1.53044400  |
| C                                    | -2.65384900 | 0.41033200  | -0.92479500 | O  | 2.84497400  | -1.60823300 | 1.07290000  |
| C                                    | -1.30268800 | 0.81698000  | -0.95017500 | C  | 3.92067600  | -2.54328200 | 0.91456400  |
| C                                    | -0.84179400 | 1.84309400  | -0.12803200 | H  | 4.20048100  | -2.49156200 | -0.13333800 |
| C                                    | -1.73213300 | 2.50864500  | 0.73204700  | H  | 4.76859100  | -2.25945400 | 1.54081700  |
| C                                    | -3.08274100 | 2.14090700  | 0.74408700  |    |             |             |             |
| C                                    | -3.54303700 | 1.04968100  | -0.03671500 |    |             |             |             |
| H                                    | -0.64288800 | 0.31163300  | -1.64772000 |    |             |             |             |

H 3.58626000 -3.55325600 1.15810000  
O -2.99304100 -0.63541500 -1.68162300  
C -4.25389900 -0.63171600 -2.40305000  
H -4.09003100 -1.28955400 -3.25137800  
H -5.05289000 -1.00775000 -1.77005000  
H -4.47883500 0.37754500 -2.74773700

SSE – Ca<sup>2+</sup> - position 4.

C -2.75137400 0.50353900 -0.09164800  
C -1.47264000 0.86228700 -0.47492700  
C -0.98315800 2.10215700 -0.07186900  
C -1.80306700 3.01786200 0.59586300  
C -3.11817500 2.68975500 0.89737000  
C -3.57795300 1.41072200 0.57322400  
H -0.83566700 0.15256600 -0.98588000  
H -1.38064800 3.97733100 0.86686900  
O -4.90376200 1.04902300 0.86522400  
C 0.48274400 2.42280800 -0.25921500  
H 0.78663000 2.11957400 -1.27195400  
O 0.64878400 3.79714200 -0.05898500  
H 1.59106400 3.97501700 0.08786000  
C 1.30512500 1.58901600 0.75505700  
H 1.03104900 1.91322100 1.76557600  
C 2.80905900 1.72848200 0.53854700  
H 3.32888500 1.12936700 1.29170600  
H 3.06202200 1.33753000 -0.45273100  
O 0.94852500 0.22544900 0.55102500  
O 3.13230500 3.10602100 0.65782500  
H 4.08190000 3.23866600 0.59459200  
C 1.08130100 -0.61202200 1.63260300  
C 2.15388800 -1.51354000 1.67397700  
C 0.12134700 -0.60829900 2.64812000  
C 2.25597800 -2.40846300 2.74139200  
C 0.23065700 -1.49432500 3.71819300  
C 1.29953900 -2.38328000 3.74708700  
H 3.07598500 -3.11013900 2.79824700  
H -0.49029200 -1.49375500 4.52387100  
H 1.39071000 -3.07116600 4.57834600  
O -0.89920300 0.29735600 2.50115600

C -1.66186200 0.58765100 3.66289800  
H -2.29922000 -0.25620900 3.94561800  
H -1.01472100 0.84615600 4.50442800  
H -2.28431100 1.44577500 3.40998800  
H -5.26671300 1.69266400 1.50097200  
O -4.03719700 3.44315100 1.52882500  
C -3.63646900 4.74566200 1.99261900  
H -4.51324200 5.16938200 2.47239600  
H -2.82189000 4.65018400 2.71212100  
H -3.33293400 5.36454600 1.14736500  
Ca -5.10663100 0.12440800 -1.18354400  
O 3.02563800 -1.42665000 0.64999300  
C 4.13573300 -2.31818600 0.64718900  
H 4.70079400 -2.08535900 -0.25120600  
H 4.76370200 -2.16167300 1.52763400  
H 3.79951900 -3.35703200 0.60897200  
O -3.27843100 -0.77785300 -0.34252100  
C -2.58612000 -1.85373000 0.37968800  
H -2.64795100 -1.63922200 1.44572500  
H -3.09784200 -2.77646500 0.11930200  
H -1.54768300 -1.87666800 0.05477700

SSE – Ca<sup>2+</sup> - position 5.

C -2.20800300 0.24042900 -0.93170400  
C -0.96143400 0.87522300 -0.81932800  
C -0.85506900 2.07291000 -0.12868500  
C -2.01250600 2.73719300 0.28313600  
C -3.26077600 2.16470600 0.05226700  
C -3.36824200 0.85976700 -0.49321900  
H -0.08673500 0.40070500 -1.26448500  
H -1.91688700 3.69593000 0.77649200  
O -4.54397900 0.21858100 -0.55065200  
C 0.51096200 2.55942400 0.27616500  
H 1.23179900 2.30480000 -0.51264700  
O 0.43947600 3.93877100 0.48238700  
H 1.32942100 4.26630800 0.66918400  
C 0.97674100 1.89461200 1.61031000  
H 0.50925000 2.43923800 2.42942100  
C 2.50155000 1.91838800 1.71530200

|                                    |             |             |             |   |             |             |             |
|------------------------------------|-------------|-------------|-------------|---|-------------|-------------|-------------|
| H                                  | 2.82245800  | 1.67778400  | 2.73252500  | C | -1.46389400 | 0.34168200  | -0.71183100 |
| H                                  | 2.91317400  | 1.17014500  | 1.02267000  | C | -0.84619300 | 1.45682600  | -0.16789700 |
| O                                  | 0.51374300  | 0.49620000  | 1.69840100  | C | -1.58259100 | 2.33993300  | 0.63583300  |
| O                                  | 2.89709700  | 3.22165200  | 1.34985800  | C | -2.92029500 | 2.08903800  | 0.88108000  |
| H                                  | 3.83767800  | 3.35129500  | 1.50174000  | C | -3.54290900 | 0.95291300  | 0.32872600  |
| C                                  | 1.15038400  | -0.37288000 | 2.58400900  | H | -0.89138600 | -0.34951100 | -1.31926700 |
| C                                  | 1.62167100  | -1.59207100 | 2.08133400  | H | -1.09335400 | 3.19583200  | 1.08664100  |
| C                                  | 1.25997900  | -0.09342000 | 3.96016900  | O | -4.84398100 | 0.70495500  | 0.57710600  |
| C                                  | 2.24646500  | -2.51881700 | 2.90552800  | C | 0.62351700  | 1.69506400  | -0.37815400 |
| C                                  | 1.90592700  | -1.01582800 | 4.78205400  | H | 0.99167500  | 1.02120400  | -1.15962200 |
| C                                  | 2.39623500  | -2.20380700 | 4.24957600  | O | 0.87289300  | 3.06159500  | -0.79041400 |
| H                                  | 2.61166900  | -3.45857300 | 2.51368300  | H | 0.08868800  | 3.31783300  | -1.29020400 |
| H                                  | 2.02300000  | -0.81604400 | 5.83822900  | C | 1.44288800  | 1.40890900  | 0.88193300  |
| H                                  | 2.89184400  | -2.90899800 | 4.90499200  | H | 1.00053700  | 1.93183500  | 1.73810100  |
| O                                  | 0.74242800  | 1.07660300  | 4.35423600  | C | 2.92425500  | 1.77337200  | 0.76109800  |
| C                                  | 0.86547600  | 1.44279500  | 5.73600500  | H | 3.50225300  | 1.12158500  | 1.41979000  |
| H                                  | 0.34625700  | 0.72060400  | 6.36834300  | H | 3.27780400  | 1.60814400  | -0.26095000 |
| H                                  | 1.91740300  | 1.51366400  | 6.01863800  | O | 1.34310100  | 0.00266700  | 1.03967600  |
| H                                  | 0.39326300  | 2.41663500  | 5.82312600  | O | 3.18944200  | 3.14591900  | 1.08151800  |
| H                                  | -5.25170800 | 0.81715700  | -0.26655000 | H | 3.27037700  | 3.22993400  | 2.03569500  |
| O                                  | -4.44415100 | 2.68588900  | 0.38218100  | C | 1.53578600  | -0.47589200 | 2.31811200  |
| C                                  | -4.49234400 | 4.01501700  | 0.92032100  | C | 2.63948100  | -1.26607300 | 2.59003000  |
| H                                  | -5.54649900 | 4.24316900  | 1.04278800  | C | 0.57302000  | -0.23032000 | 3.31249700  |
| H                                  | -3.98797200 | 4.04724100  | 1.88766700  | C | 2.81686200  | -1.81541500 | 3.85843600  |
| H                                  | -4.03486200 | 4.71685900  | 0.22133800  | H | 3.33851900  | -1.46608500 | 1.78591800  |
| O                                  | 1.33830000  | -1.83870200 | 0.73739500  | C | 0.75826700  | -0.77518200 | 4.57983900  |
| C                                  | 2.29984700  | -2.62755600 | -0.01013500 | C | 1.87801700  | -1.56265200 | 4.84630400  |
| H                                  | 2.05316200  | -2.49232500 | -1.06022100 | H | 3.67645400  | -2.44029600 | 4.06307300  |
| H                                  | 3.30094500  | -2.25075400 | 0.19519600  | H | 0.02807100  | -0.60589400 | 5.35973400  |
| H                                  | 2.21680900  | -3.67843000 | 0.26332800  | H | 2.00149300  | -1.98557900 | 5.83551700  |
| O                                  | -2.15863900 | -1.12521100 | -1.20250700 | O | -0.48572000 | 0.53366200  | 2.94210400  |
| C                                  | -2.91382300 | -1.61786000 | -2.35032700 | C | -1.58195100 | 0.61270400  | 3.83844500  |
| H                                  | -2.71289600 | -2.68398800 | -2.40722600 | H | -1.95122400 | -0.38548900 | 4.08728900  |
| H                                  | -3.97217300 | -1.42871400 | -2.18877000 | H | -1.30667900 | 1.14305500  | 4.75499500  |
| H                                  | -2.55030900 | -1.11024700 | -3.24266900 | H | -2.35950300 | 1.16410200  | 3.31335700  |
| Ca                                 | -0.85848600 | -1.12157200 | 0.77122200  | H | -5.19976000 | 1.41440300  | 1.12627000  |
|                                    |             |             |             | H | -3.30909200 | -0.78045500 | -0.87747000 |
| GGE – K <sup>+</sup> - position 1. |             |             |             | O | -3.74434400 | 2.84114700  | 1.66523700  |
| C                                  | -2.81095400 | 0.08718000  | -0.46375800 | C | -3.21486800 | 4.01901300  | 2.24296800  |

H -4.02508100 4.47277800 2.80784300  
H -2.38531100 3.78291300 2.91716200  
H -2.87577300 4.71174700 1.46719400  
K 2.85392400 4.72484100 -0.86954000

GGE – K<sup>+</sup> - position 2.

C -2.69553800 0.30725700 -1.10117300  
C -1.34370600 0.65458500 -1.01571900  
C -0.93020100 1.68800400 -0.18371200  
C -1.88201000 2.40308600 0.55705000  
C -3.22776800 2.07078600 0.46529700  
C -3.64041400 1.00562000 -0.36285000  
H -0.61616900 0.12246100 -1.61817600  
H -1.55128000 3.24431100 1.15345400  
O -4.94415200 0.67194200 -0.44439400  
C 0.52703300 2.07100500 -0.06979600  
H 1.04825700 1.72070500 -0.97120900  
O 0.58601200 3.47339200 0.03894100  
H 1.51425000 3.72506500 0.13113000  
C 1.21309500 1.44038800 1.16339500  
H 0.89664500 2.00374900 2.04785400  
C 2.73462900 1.46306100 1.02572400  
H 3.20416200 1.10933900 1.94830200  
H 3.01731600 0.79338300 0.20355300  
O 0.77297600 0.07238400 1.28571600  
O 3.11110200 2.80072300 0.74810400  
H 4.06609700 2.86979400 0.67394300  
C 1.26697700 -0.60952900 2.38462700  
C 2.24638000 -1.57721500 2.22140100  
C 0.73236600 -0.35359600 3.65685000  
C 2.72814000 -2.27531700 3.32433700  
H 2.62689800 -1.76160400 1.22339900  
C 1.22486400 -1.04236700 4.76060300  
C 2.22510900 -1.99625600 4.58819800  
H 3.49682700 -3.02610400 3.19502500  
H 0.83455000 -0.84682200 5.75066400  
H 2.60242400 -2.52727300 5.45298800  
O -0.29600800 0.55525000 3.70640300  
C -0.60659400 1.12152800 4.97987600

H -1.06718700 0.38144000 5.63810700  
H 0.29508900 1.52360300 5.44594500  
H -1.31071200 1.92792600 4.78823500  
H -5.46823500 1.33675800 0.02165500  
H -3.03893900 -0.47443700 -1.76851300  
O -4.24720200 2.69498500 1.10673800  
C -3.96559100 3.92652000 1.76216500  
H -4.92172900 4.30682400 2.11075800  
H -3.30107400 3.76754000 2.61566600  
H -3.51253900 4.63531000 1.06552000  
K -1.79674700 -0.52361900 1.72531800

GGE – K<sup>+</sup> - position 3.

C -2.67545100 0.00429300 0.09748500  
C -1.36696700 0.35026100 -0.21650200  
C -0.89723100 1.62706400 0.06279500  
C -1.75007500 2.56463100 0.64206200  
C -3.05793300 2.22283600 0.95218600  
C -3.51567000 0.93377000 0.68431200  
H -0.70846500 -0.38321500 -0.66326800  
H -1.36061400 3.55593800 0.82804000  
O -4.83626900 0.63709900 1.00425800  
C 0.54083200 2.00744000 -0.21216900  
H 0.84675400 1.54874100 -1.16358800  
O 0.61761300 3.41277300 -0.28263200  
H 1.54414000 3.67498000 -0.19333100  
C 1.46932400 1.46307300 0.89005500  
H 1.19845100 1.94122500 1.83671600  
C 2.94753600 1.68956400 0.58711000  
H 3.53987300 1.22399600 1.38142000  
H 3.18987900 1.20652100 -0.36661500  
O 1.26960800 0.05381400 0.95235900  
O 3.18750900 3.09041700 0.52850600  
H 4.11877700 3.25887600 0.36644400  
C 1.47979300 -0.53323600 2.17700800  
C 2.53527400 -1.41239300 2.34384800  
C 0.58264500 -0.29673400 3.23315900  
C 2.72805000 -2.06061000 3.56266300  
H 3.19297100 -1.58663500 1.50014500

C 0.78423700 -0.93553400 4.45221800  
C 1.85611200 -1.81440400 4.61102800  
H 3.55447100 -2.74869600 3.68525000  
H 0.11060800 -0.76418000 5.28107900  
H 1.99738100 -2.30728600 5.56484600  
O -0.43986100 0.55959600 2.96315900  
C -1.37974100 0.79738800 3.98893100  
H -1.87743400 -0.12982400 4.28999100  
H -0.90849700 1.25779000 4.86279500  
H -2.11292600 1.48220200 3.56487600  
H -4.96176900 -0.31363500 0.91738900  
H -3.04589800 -0.99338500 -0.11747800  
O -3.97245200 3.09586100 1.51836900  
C -3.45748000 4.35573500 1.94967800  
H -4.27912600 4.87546000 2.44111900  
H -2.64278700 4.21242700 2.66216800  
H -3.10746300 4.94472400 1.10004100  
K -6.49603600 2.57125800 1.35113300

SSE – K<sup>+</sup> - position 1.

C -2.86729400 1.13353500 0.51052500  
C -1.53266000 1.03682000 0.15345000  
C -0.77770200 2.20307100 0.01323300  
C -1.39535700 3.43815700 0.16735900  
C -2.74573200 3.53958800 0.52305200  
C -3.48485500 2.37848400 0.72517400  
H -1.05832300 0.07374100 0.03780300  
H -0.88562000 4.36856900 -0.05456200  
O -4.77243700 2.43811000 1.13847100  
C 0.72106300 2.09589600 -0.20772800  
H 0.94773300 1.48504500 -1.08732300  
O 1.31799700 3.38699600 -0.34904300  
H 1.22607600 3.67665400 -1.26104700  
C 1.40340100 1.38786600 0.98572300  
H 0.87849700 1.63252600 1.92074400  
C 2.87836100 1.73591900 1.15930400  
H 3.36457700 0.91443500 1.68879600  
H 3.36357400 1.88141300 0.19143700  
O 1.23982400 0.00386400 0.71934900

O 2.95229600 2.93470400 1.94665700  
H 3.86606000 3.07320300 2.20935800  
C 1.46598400 -0.84709300 1.77831500  
C 2.61450600 -1.64570500 1.77737800  
C 0.51703400 -0.97492100 2.79849500  
C 2.80666700 -2.57778100 2.79982700  
C 0.71534000 -1.89628000 3.82532500  
C 1.85754800 -2.68775300 3.80712500  
H 3.68229900 -3.21079200 2.81473500  
H -0.00697400 -2.00593300 4.62187900  
H 2.01097500 -3.41030000 4.59899900  
O -0.56255900 -0.15667500 2.68948100  
C -1.61835000 -0.31484300 3.62368100  
H -1.99858200 -1.34037400 3.61462800  
H -1.29389500 -0.05564200 4.63518100  
H -2.40305800 0.36805100 3.30092600  
H -5.12303200 1.53815500 1.16469900  
O -3.23630800 4.79104500 0.70923500  
C -4.54657200 5.08517100 0.20704800  
H -4.57567600 6.16445200 0.07420400  
H -4.70242000 4.59033000 -0.75398700  
H -5.31342900 4.76911300 0.91096200  
K 0.87114400 4.50035300 2.01305200  
O 3.47345000 -1.43315700 0.75458700  
C 4.59233300 -2.30006300 0.64457000  
H 5.11333700 -2.00045700 -0.26111000  
H 5.26001500 -2.19281800 1.50382200  
H 4.27046000 -3.34051500 0.55420400  
O -3.69291200 0.07876100 0.73783100  
C -3.18754600 -1.22458500 0.47709200  
H -3.99491500 -1.91269500 0.71317700  
H -2.91237100 -1.32353800 -0.57575500  
H -2.31931300 -1.43442500 1.10759500

SSE – K<sup>+</sup> - position 2.

C -2.91358300 0.47657700 -0.01785600  
C -1.59599400 0.74751200 -0.34957600  
C -1.04847000 1.98113900 -0.00489300  
C -1.81780000 2.94630800 0.63515500

C -3.14581200 2.67266900 0.94581900  
C -3.69060300 1.43978700 0.62460900  
H -0.97760900 0.00388800 -0.83238200  
H -1.35780800 3.89649100 0.86456100  
O -5.00881700 1.15086100 0.92733200  
C 0.41348800 2.26435500 -0.27949900  
H 0.67292000 1.84571300 -1.26276900  
O 0.60286900 3.65981000 -0.26082100  
H 1.54643200 3.84026400 -0.14883100  
C 1.30423700 1.57409000 0.77168600  
H 1.06355600 1.99271700 1.75513300  
C 2.79576100 1.71736800 0.48299800  
H 3.35291500 1.15474100 1.23786300  
H 3.00812400 1.28427500 -0.50058400  
O 0.99969700 0.18321400 0.72608900  
O 3.13218700 3.10065600 0.52555700  
H 4.07164800 3.21439600 0.36440400  
C 1.21438200 -0.51391000 1.88489500  
C 2.29010400 -1.40415200 1.96865600  
C 0.32015800 -0.38732100 2.95352000  
C 2.46702300 -2.16852000 3.12471000  
C 0.50279700 -1.14178300 4.11195500  
C 1.57437600 -2.02441700 4.17819700  
H 3.28990500 -2.86383600 3.20923800  
H -0.17552800 -1.05309800 4.94876000  
H 1.71708200 -2.61505200 5.07464000  
O -0.68969000 0.50029000 2.75647600  
C -1.62053300 0.67770300 3.80347600  
H -2.14775900 -0.25536900 4.02515300  
H -1.13265700 1.04515400 4.71139400  
H -2.33058100 1.42032900 3.44203700  
H -5.14158400 0.22352700 0.67753500  
O -3.99900500 3.56758500 1.56922800  
C -3.40410900 4.77337900 2.04929400  
H -4.18853100 5.32029200 2.57100800  
H -2.59376400 4.54865700 2.74535800  
H -3.02634400 5.37589100 1.22147000  
K -6.54768000 3.11365800 1.48834600  
O 3.09930400 -1.44695700 0.88442800

C 4.17568900 -2.36840000 0.90554900  
H 4.67881900 -2.26192400 -0.05232100  
H 4.87578300 -2.13897500 1.71391000  
H 3.81179900 -3.39371500 1.01424500  
O -3.58235800 -0.68644700 -0.25145300  
C -2.83878200 -1.76898200 -0.80091300  
H -3.52522100 -2.60967400 -0.85531400  
H -2.48290200 -1.51806700 -1.80253300  
H -1.99343700 -2.01624700 -0.15423200

SSE – K<sup>+</sup> - position 3.

C -2.75237100 0.46937700 -0.96136900  
C -1.38704300 0.77392400 -0.93174300  
C -0.89962400 1.77323100 -0.09930600  
C -1.78206900 2.50918400 0.69930200  
C -3.14209000 2.22525800 0.65716000  
C -3.63789200 1.18918900 -0.15595500  
H -0.72619900 0.20431600 -1.57571200  
H -1.39298400 3.32300100 1.29728500  
O -4.95488900 0.88174100 -0.15131800  
C 0.57712400 2.08827800 -0.04746300  
H 1.04224700 1.71214100 -0.96867100  
O 0.70596000 3.48748800 0.05119500  
H 1.64624000 3.69247700 0.13983300  
C 1.28858200 1.43058000 1.15655900  
H 1.04274300 2.01335400 2.05183100  
C 2.79994400 1.38866000 0.94342700  
H 3.29122200 0.95177600 1.81871600  
H 3.01364100 0.76469100 0.06973300  
O 0.79238000 0.08786400 1.31686000  
O 3.22426000 2.72897400 0.74479100  
H 4.17108500 2.75695600 0.58773000  
C 1.26192000 -0.58138000 2.42805300  
C 2.26894600 -1.54860300 2.28802200  
C 0.69963200 -0.33205900 3.68361500  
C 2.71174400 -2.24387000 3.41416400  
C 1.15118700 -1.01636700 4.81024700  
C 2.15553300 -1.96283700 4.65631600  
H 3.48869700 -2.99046300 3.33151300

|                                    |             |             |             |   |             |             |             |
|------------------------------------|-------------|-------------|-------------|---|-------------|-------------|-------------|
| H                                  | 0.73154700  | -0.82230700 | 5.78732900  | C | 1.30490900  | 1.56472100  | 0.79015200  |
| H                                  | 2.51142300  | -2.50029500 | 5.52633400  | H | 1.06108000  | 1.95443600  | 1.78444100  |
| O                                  | -0.32605100 | 0.57941100  | 3.69669100  | C | 2.80136100  | 1.69005400  | 0.52086100  |
| C                                  | -0.66870800 | 1.15772300  | 4.95571500  | H | 3.34220900  | 1.10188600  | 1.26838600  |
| H                                  | -1.14762200 | 0.42496100  | 5.60902300  | H | 3.01702200  | 1.27580500  | -0.47018600 |
| H                                  | 0.22067300  | 1.56353600  | 5.44154600  | O | 0.97561900  | 0.18036900  | 0.69640200  |
| H                                  | -1.36700300 | 1.96224500  | 4.73690100  | O | 3.15681100  | 3.06620600  | 0.59775600  |
| H                                  | -5.42168300 | 1.54434900  | 0.37550300  | H | 4.09985500  | 3.17098000  | 0.45250600  |
| O                                  | -4.10836500 | 2.86402500  | 1.36546300  | C | 1.15888000  | -0.55301800 | 1.83798300  |
| C                                  | -3.75098900 | 4.06137400  | 2.04615400  | C | 2.21778000  | -1.46449900 | 1.91168100  |
| H                                  | -4.67441700 | 4.46073800  | 2.45637800  | C | 0.25575500  | -0.43502700 | 2.90088400  |
| H                                  | -3.04971200 | 3.85059400  | 2.85769500  | C | 2.37091700  | -2.25754400 | 3.05159000  |
| H                                  | -3.30927400 | 4.77883600  | 1.35123800  | C | 0.41634900  | -1.21774200 | 4.04428600  |
| K                                  | -1.76107400 | -0.55756900 | 1.70709100  | C | 1.47195600  | -2.11989000 | 4.10077700  |
| O                                  | 2.74916400  | -1.71002900 | 1.04043500  | H | 3.18225900  | -2.96712200 | 3.12894400  |
| C                                  | 3.76613000  | -2.68422800 | 0.84195200  | H | -0.26576400 | -1.13261100 | 4.87837500  |
| H                                  | 3.99656400  | -2.65982000 | -0.21968300 | H | 1.59804000  | -2.73009000 | 4.98657600  |
| H                                  | 4.66090700  | -2.43706100 | 1.41890200  | O | -0.73840800 | 0.47193000  | 2.71623200  |
| H                                  | 3.40945900  | -3.68000700 | 1.11622800  | C | -1.62356300 | 0.70357300  | 3.79404500  |
| O                                  | -3.17721700 | -0.58168800 | -1.71104600 | H | -2.19551800 | -0.19759400 | 4.03594100  |
| C                                  | -4.07091600 | -0.25754400 | -2.78618100 | H | -1.08410500 | 1.04188300  | 4.68351200  |
| H                                  | -4.25593200 | -1.19128100 | -3.31100500 | H | -2.30178900 | 1.48588600  | 3.45741300  |
| H                                  | -5.00666800 | 0.14862900  | -2.40376600 | H | -5.30247500 | 1.84869400  | 1.41381700  |
| H                                  | -3.59191500 | 0.45654500  | -3.46015500 | O | -3.99934100 | 3.37942100  | 1.70278400  |
|                                    |             |             |             | C | -3.54113400 | 4.64721500  | 2.16012900  |
|                                    |             |             |             | H | -4.38240600 | 5.10454800  | 2.67397700  |
| SSE – K <sup>+</sup> - position 4. |             |             |             | H | -2.70494100 | 4.52496500  | 2.85273600  |
| C                                  | -2.88469300 | 0.49691000  | -0.13284200 | H | -3.23642300 | 5.27017400  | 1.31660500  |
| C                                  | -1.56940600 | 0.81443800  | -0.44317000 | K | -6.08108600 | -0.83770700 | -0.36181400 |
| C                                  | -1.02726400 | 2.01786500  | -0.00443100 | O | 3.03747400  | -1.49596800 | 0.83455600  |
| C                                  | -1.79888800 | 2.92667400  | 0.71335600  | C | 4.11598400  | -2.41470100 | 0.85824700  |
| C                                  | -3.11878100 | 2.60925300  | 1.00155600  | H | 4.63582700  | -2.28966800 | -0.08841000 |
| C                                  | -3.66086500 | 1.39682900  | 0.58287700  | H | 4.80071800  | -2.19793600 | 1.68307100  |
| H                                  | -0.93916700 | 0.12124000  | -0.98154900 | H | 3.75400700  | -3.44310900 | 0.94216500  |
| H                                  | -1.35229900 | 3.86040600  | 1.02537900  | O | -3.50257900 | -0.68656900 | -0.49371900 |
| O                                  | -4.97946400 | 1.10579000  | 0.88162400  | C | -2.63900000 | -1.72673200 | -0.95579500 |
| C                                  | 0.43778300  | 2.31067900  | -0.24376300 | H | -1.83859400 | -1.90285000 | -0.23433000 |
| H                                  | 0.71389000  | 1.94049800  | -1.24211000 | H | -3.25245500 | -2.62212600 | -1.04881300 |
| O                                  | 0.62987200  | 3.70139700  | -0.15047900 | H | -2.21604800 | -1.47509900 | -1.92991700 |
| H                                  | 1.57382600  | 3.87331000  | -0.03052700 |   |             |             |             |



SSE – K<sup>+</sup> - position 5.

|   |             |             |             |   |             |             |             |
|---|-------------|-------------|-------------|---|-------------|-------------|-------------|
| C | -2.32700700 | 0.15656700  | -0.91998800 | C | -4.43856400 | 4.01301800  | 0.96011900  |
| C | -1.06031600 | 0.71126800  | -0.74185600 | H | -5.47371200 | 4.30949600  | 1.10516600  |
| C | -0.90945400 | 1.92377800  | -0.08963200 | H | -3.92000700 | 3.99740700  | 1.92183100  |
| C | -2.03764700 | 2.64694700  | 0.30245800  | H | -3.94402100 | 4.71051300  | 0.28030400  |
| C | -3.30154600 | 2.12211700  | 0.06823400  | K | -1.12504100 | -1.55968900 | 1.04823500  |
| C | -3.45979800 | 0.85154900  | -0.51288500 | O | 1.59207600  | -1.73966500 | 0.75870000  |
| H | -0.19426900 | 0.15151900  | -1.08336100 | C | 2.43074000  | -2.69952100 | 0.11674500  |
| H | -1.90363200 | 3.61206800  | 0.77185800  | H | 2.22937600  | -2.60964200 | -0.94794900 |
| O | -4.68677700 | 0.29959900  | -0.65195900 | H | 3.48155400  | -2.47826000 | 0.31354900  |
| C | 0.47215200  | 2.41680500  | 0.25482000  | H | 2.19781900  | -3.71392400 | 0.44929500  |
| H | 1.16994400  | 2.07925900  | -0.52446900 | O | -2.40371300 | -1.15029500 | -1.34801100 |
| O | 0.43091700  | 3.82047100  | 0.32392300  | C | -3.08300900 | -1.35716700 | -2.59773800 |
| H | 1.31728200  | 4.13022400  | 0.54763600  | H | -3.02121300 | -2.42273700 | -2.80591200 |
| C | 0.96115400  | 1.85844500  | 1.61780500  | H | -4.12460700 | -1.04910500 | -2.51827500 |
| H | 0.48075900  | 2.43888300  | 2.40776500  | H | -2.57638500 | -0.79417000 | -3.38413500 |
| C | 2.48378700  | 1.94881900  | 1.72436100  |   |             |             |             |
| H | 2.81042500  | 1.72542700  | 2.74361200  |   |             |             |             |
| H | 2.92214500  | 1.21136100  | 1.03856700  |   |             |             |             |
| O | 0.55171000  | 0.47536500  | 1.73662300  |   |             |             |             |
| O | 2.85734800  | 3.26609700  | 1.35870400  |   |             |             |             |
| H | 3.80449800  | 3.38333100  | 1.46183000  |   |             |             |             |
| C | 1.23559800  | -0.34336300 | 2.60418100  |   |             |             |             |
| C | 1.80060300  | -1.51801000 | 2.09441700  |   |             |             |             |
| C | 1.31767100  | -0.07171400 | 3.97922200  |   |             |             |             |
| C | 2.47966700  | -2.39963900 | 2.93503800  |   |             |             |             |
| C | 2.00496100  | -0.94830400 | 4.81790800  |   |             |             |             |
| C | 2.58042100  | -2.09618100 | 4.28580000  |   |             |             |             |
| H | 2.92988100  | -3.30241600 | 2.54673600  |   |             |             |             |
| H | 2.09052500  | -0.74517800 | 5.87595100  |   |             |             |             |
| H | 3.11288700  | -2.77303800 | 4.94196100  |   |             |             |             |
| O | 0.72151200  | 1.07235100  | 4.37604300  |   |             |             |             |
| C | 0.80943100  | 1.42769500  | 5.75089300  |   |             |             |             |
| H | 0.32954300  | 0.67277100  | 6.37830400  |   |             |             |             |
| H | 1.85176300  | 1.55645700  | 6.05285300  |   |             |             |             |
| H | 0.28127300  | 2.37236600  | 5.84735600  |   |             |             |             |
| H | -5.34254500 | 0.94434100  | -0.35355300 |   |             |             |             |
| O | -4.47924200 | 2.70960100  | 0.39301200  |   |             |             |             |
